# Supplementary figures and images for: Transient and Prolonged Activation of Wnt Signaling Contribute Oppositely to the Pathogenesis of Asherman’s Syndrome
Source: MDPI journal article supplement (doi:10.3390/ijms23158808), 2022-08-08

## Control

24 h

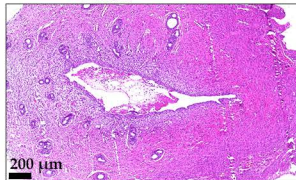

48 h

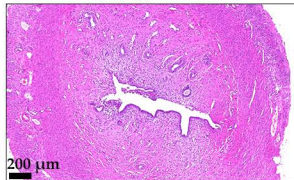

72 h

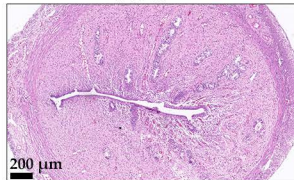

day 7

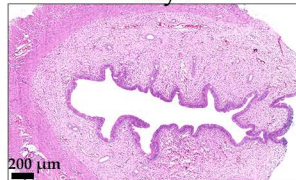

## Wnt 7a

24 h

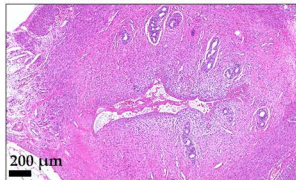

48 h

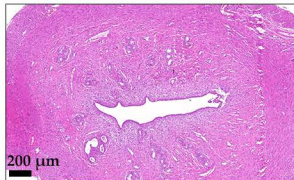

72 h

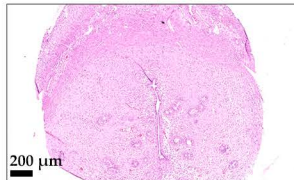

day 7

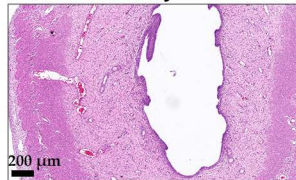

Supplement: s1 [file s1]
